# Supplementary material for: Production and characterization of novel marine black yeast’s exopolysaccharide with potential antiradical and anticancer prospects
Source: Springer Nature journal article supplement (doi:10.1186/s12934-024-02332-1), 2024-02-22
Supplement: MOESM1 [file 12934_2024_2332_MOESM1_ESM.pdf]

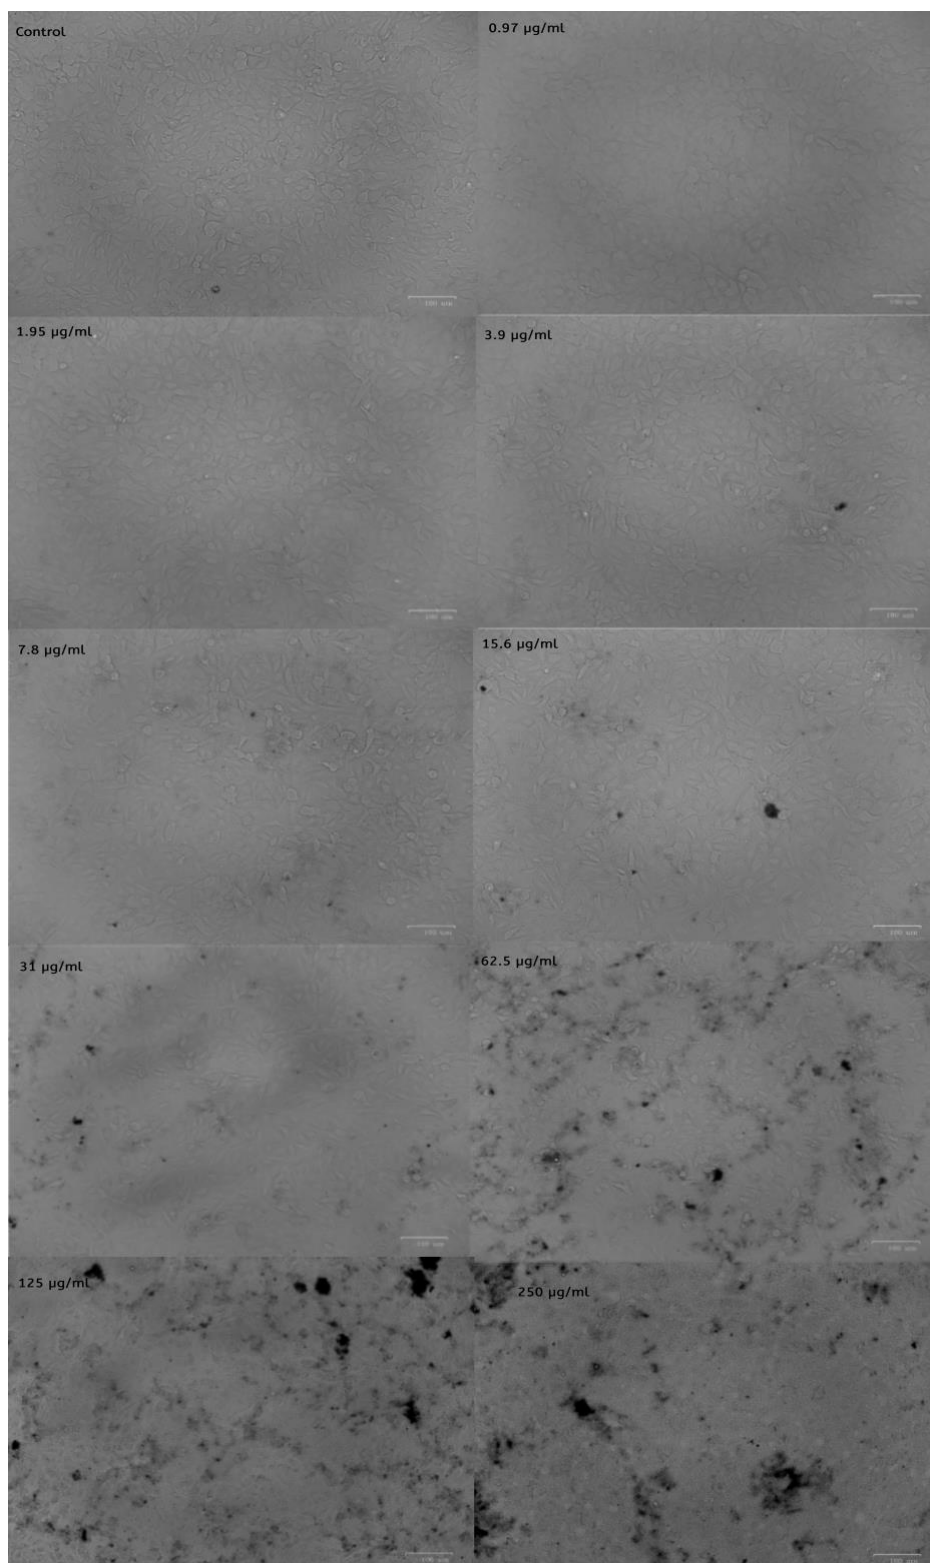

**Fig. S1** Anticancer activity of SAHE-EPS against human lung cancer cell lines (A549) with different concentrations.
